# Supplementary material for: ERCC2 Helicase Domain Mutations Confer Nucleotide Excision Repair Deficiency and Drive Cisplatin Sensitivity in Muscle-Invasive Bladder Cancer
Source: Oxford University Press journal article supplement (doi:10.1158/1078-0432.ccr-18-1001), 2018-07-06
Supplement: 10780432ccr181001-sup-199439_2_supp_4813641_pc150w.xlsx [file 10780432ccr181001-sup-199439_2_supp_4813641_pc150w.xlsx]

## Sheet: Table S1 description
Supplementary Table 1: ERCC2 mutations identified across bladder tumor cohorts
Data were dowloaded from cBioPortal (Gao et al. Sci Signal 2013; 6(269):pI1 and Cerami et al. Cancer Discov 2012; 2(5): 401) on 2.28.18
ERCC2 mutations from the following cohorts were included:
Kim et al. Eur Urol 2015; 67(2): 198
Iyer et al. J Clin Oncol 2013; 31(25): 3133
Al-Ahmadie et al. Nat Genet 2016; 48(4): 356
Guo et al. Nat Genet 2013; 45(12): 1459
Van Allen et al. Cancer Discov 2014; 4(10): 1140
Robertson et al. Cell 2017; 171(3): 540
Zehir et al. Nat Med 2017; 23(6): 703 (bladder/urothelial cases only)

## Sheet: Table S1
Study	Sample ID	Cancer Type	Protein Change		Annotation	Functional Impact	Mutation Type	Copy #	COSMIC	MS	VS	Center	Chromosome	Start Pos	End Pos	Ref	Var	Allele Freq (T)	Allele Freq (N)	Variant Reads	Ref Reads	Variant Reads (N)	Ref Reads (N)	# Mut in Sample
Bladder Urothelial Carcinoma (TCGA, Provisional)	TCGA-DK-A1A3-01	Bladder Urothelial Carcinoma	Y14C	14	OncoKB: Predicted Oncogenic, level_3a;CIViC: NA;MyCancerGenome: not present;CancerHotspot: yes;3DHotspot: no	MutationAssessor: Error;SIFT: impact: deleterious, score: 0;Polyphen-2: impact: probably_damaging, score: 0.987	Missense_Mutation			Somatic	NA	broad.mit.edu	19	45873455	45873455	T	C			4	27	-1	-1	572
Bladder Urothelial Carcinoma (TCGA, Provisional)	TCGA-DK-A1AC-01	Bladder Urothelial Carcinoma	Y14C	14	OncoKB: Predicted Oncogenic, level_3a;CIViC: NA;MyCancerGenome: not present;CancerHotspot: yes;3DHotspot: no	MutationAssessor: Error;SIFT: impact: deleterious, score: 0;Polyphen-2: impact: probably_damaging, score: 0.987	Missense_Mutation			Somatic	NA	broad.mit.edu	19	45873455	45873455	T	C			12	27	-1	-1	1283
Bladder Urothelial Carcinoma (BGI, Nat Genet 2013)	B22	Bladder Urothelial Carcinoma	S23C	23	OncoKB: Unknown, level NA;CIViC: NA;MyCancerGenome: not present;CancerHotspot: no;3DHotspot: no	MutationAssessor: Error;SIFT: impact: deleterious, score: 0.02;Polyphen-2: impact: possibly_damaging, score: 0.76	Missense_Mutation			NA	NA	BGI	19	45873428	45873428	G	C			-1	-1	-1	-1	255
MSK-IMPACT Clinical Sequencing Cohort (MSKCC, Nat Med 2017)	P-0003071-T01-IM5	Bladder Urothelial Carcinoma	Y24C	24	OncoKB: Likely Oncogenic, level_3a;CIViC: NA;MyCancerGenome: not present;CancerHotspot: yes;3DHotspot: no	MutationAssessor: Error;SIFT: impact: deleterious, score: 0;Polyphen-2: impact: probably_damaging, score: 0.999	Missense_Mutation			NA	NA	NA	19	45873425	45873425	T	C			214	614	-1	-1	6
MSK-IMPACT Clinical Sequencing Cohort (MSKCC, Nat Med 2017)	P-0003434-T01-IM5	Bladder Urothelial Carcinoma	Y24C	24	OncoKB: Likely Oncogenic, level_3a;CIViC: NA;MyCancerGenome: not present;CancerHotspot: yes;3DHotspot: no	MutationAssessor: Error;SIFT: impact: deleterious, score: 0;Polyphen-2: impact: probably_damaging, score: 0.999	Missense_Mutation			NA	NA	NA	19	45873425	45873425	T	C			179	150	-1	-1	23
MSK-IMPACT Clinical Sequencing Cohort (MSKCC, Nat Med 2017)	P-0003788-T01-IM5	Bladder Urothelial Carcinoma	Y24C	24	OncoKB: Likely Oncogenic, level_3a;CIViC: NA;MyCancerGenome: not present;CancerHotspot: yes;3DHotspot: no	MutationAssessor: Error;SIFT: impact: deleterious, score: 0;Polyphen-2: impact: probably_damaging, score: 0.999	Missense_Mutation			NA	NA	NA	19	45873425	45873425	T	C			188	303	-1	-1	21
Bladder Urothelial Carcinoma (Dana Farber & MSKCC, Cancer Discov 2014)	DFCI-32_R	Bladder Urothelial Carcinoma	Y24C	24	OncoKB: Likely Oncogenic, level_3a;CIViC: NA;MyCancerGenome: not present;CancerHotspot: yes;3DHotspot: no	MutationAssessor: Error;SIFT: impact: deleterious, score: 0;Polyphen-2: impact: probably_damaging, score: 0.999	Missense_Mutation			NA	NA	NA	19	45873425	45873425	T	C			-1	-1	-1	-1	705
Bladder Urothelial Carcinoma (Dana Farber & MSKCC, Cancer Discov 2014)	MSKCC-0741_R	Bladder Urothelial Carcinoma	Y24C	24	OncoKB: Likely Oncogenic, level_3a;CIViC: NA;MyCancerGenome: not present;CancerHotspot: yes;3DHotspot: no	MutationAssessor: Error;SIFT: impact: deleterious, score: 0;Polyphen-2: impact: probably_damaging, score: 0.999	Missense_Mutation			NA	NA	NA	19	45873425	45873425	T	C			-1	-1	-1	-1	399
Bladder Urothelial Carcinoma (BGI, Nat Genet 2013)	B83	Bladder Urothelial Carcinoma	M42V	42	OncoKB: Unknown, level NA;CIViC: NA;MyCancerGenome: not present;CancerHotspot: no;3DHotspot: no	MutationAssessor: Error;SIFT: impact: deleterious, score: 0;Polyphen-2: impact: possibly_damaging, score: 0.733	Missense_Mutation			NA	NA	BGI	19	45872387	45872387	T	C			-1	-1	-1	-1	109
Bladder Cancer, Plasmacytoid Variant (MSKCC, Nat Genet 2016)	DS-sig-046-P	Bladder Urothelial Carcinoma	S44L	44	OncoKB: Unknown, level NA;CIViC: NA;MyCancerGenome: not present;CancerHotspot: no;3DHotspot: no	MutationAssessor: Error;SIFT: impact: deleterious, score: 0;Polyphen-2: impact: possibly_damaging, score: 0.792	Missense_Mutation			Somatic	high	NA	19	45872380	45872380	G	A			55	450	0	475	17
Bladder Urothelial Carcinoma (BGI, Nat Genet 2013)	B22	Bladder Urothelial Carcinoma	S44L	44	OncoKB: Unknown, level NA;CIViC: NA;MyCancerGenome: not present;CancerHotspot: no;3DHotspot: no	MutationAssessor: Error;SIFT: impact: deleterious, score: 0;Polyphen-2: impact: possibly_damaging, score: 0.792	Missense_Mutation			NA	NA	BGI	19	45872380	45872380	G	A			-1	-1	-1	-1	255
Bladder Urothelial Carcinoma (BGI, Nat Genet 2013)	B34	Bladder Urothelial Carcinoma	S44L	44	OncoKB: Unknown, level NA;CIViC: NA;MyCancerGenome: not present;CancerHotspot: no;3DHotspot: no	MutationAssessor: Error;SIFT: impact: deleterious, score: 0;Polyphen-2: impact: possibly_damaging, score: 0.792	Missense_Mutation			NA	NA	BGI	19	45872380	45872380	G	A			-1	-1	-1	-1	115
MSK-IMPACT Clinical Sequencing Cohort (MSKCC, Nat Med 2017)	P-0003920-T01-IM5	Bladder Urothelial Carcinoma	S44L	44	OncoKB: Unknown, level NA;CIViC: NA;MyCancerGenome: not present;CancerHotspot: no;3DHotspot: no	MutationAssessor: Error;SIFT: impact: deleterious, score: 0;Polyphen-2: impact: possibly_damaging, score: 0.792	Missense_Mutation			NA	NA	NA	19	45872380	45872380	G	A			169	459	-1	-1	24
Bladder Urothelial Carcinoma (TCGA, Provisional)	TCGA-FT-A3EE-01	Bladder Urothelial Carcinoma	S44L	44	OncoKB: Unknown, level NA;CIViC: NA;MyCancerGenome: not present;CancerHotspot: no;3DHotspot: no	MutationAssessor: Error;SIFT: impact: deleterious, score: 0;Polyphen-2: impact: possibly_damaging, score: 0.792	Missense_Mutation			Somatic	NA	broad.mit.edu	19	45872380	45872380	G	A			18	77	-1	-1	119
Bladder Urothelial Carcinoma (TCGA, Provisional)	TCGA-FT-A61P-01	Bladder Urothelial Carcinoma	S44L	44	OncoKB: Unknown, level NA;CIViC: NA;MyCancerGenome: not present;CancerHotspot: no;3DHotspot: no	MutationAssessor: Error;SIFT: impact: deleterious, score: 0;Polyphen-2: impact: possibly_damaging, score: 0.792	Missense_Mutation			Somatic	NA	broad.mit.edu	19	45872380	45872380	G	A			36	86	-1	-1	151
MSK-IMPACT Clinical Sequencing Cohort (MSKCC, Nat Med 2017)	P-0006645-T01-IM5	Bladder Urothelial Carcinoma	T46S	46	OncoKB: Unknown, level NA;CIViC: NA;MyCancerGenome: not present;CancerHotspot: no;3DHotspot: no	MutationAssessor: Error;SIFT: impact: deleterious, score: 0;Polyphen-2: impact: possibly_damaging, score: 0.885	Missense_Mutation			NA	NA	NA	19	45872374	45872374	G	C			256	754	-1	-1	39
MSK-IMPACT Clinical Sequencing Cohort (MSKCC, Nat Med 2017)	P-0005627-T02-IM5	Bladder Urothelial Carcinoma	T49A	49	OncoKB: Unknown, level NA;CIViC: NA;MyCancerGenome: not present;CancerHotspot: no;3DHotspot: no	MutationAssessor: Error;SIFT: impact: deleterious, score: 0;Polyphen-2: impact: possibly_damaging, score: 0.844	Missense_Mutation			NA	NA	NA	19	45872366	45872366	T	C			167	825	-1	-1	28
MSK-IMPACT Clinical Sequencing Cohort (MSKCC, Nat Med 2017)	P-0006989-T01-IM5	Bladder Urothelial Carcinoma	K69E	69	OncoKB: Unknown, level NA;CIViC: NA;MyCancerGenome: not present;CancerHotspot: no;3DHotspot: no	MutationAssessor: Error;SIFT: impact: deleterious, score: 0;Polyphen-2: impact: probably_damaging, score: 0.999	Missense_Mutation			NA	NA	NA	19	45872229	45872229	T	C			361	416	-1	-1	12
MSK-IMPACT Clinical Sequencing Cohort (MSKCC, Nat Med 2017)	P-0003024-T01-IM3	Bladder Urothelial Carcinoma	Y72C	72	OncoKB: Predicted Oncogenic, level_3a;CIViC: NA;MyCancerGenome: not present;CancerHotspot: yes;3DHotspot: no	MutationAssessor: Error;SIFT: impact: deleterious, score: 0;Polyphen-2: impact: probably_damaging, score: 1	Missense_Mutation			NA	NA	NA	19	45872219	45872219	T	C			187	487	-1	-1	31
Bladder Urothelial Carcinoma (TCGA, Provisional)	TCGA-FD-A3SN-01	Bladder Urothelial Carcinoma	Y72C	72	OncoKB: Predicted Oncogenic, level_3a;CIViC: NA;MyCancerGenome: not present;CancerHotspot: yes;3DHotspot: no	MutationAssessor: Error;SIFT: impact: deleterious, score: 0;Polyphen-2: impact: probably_damaging, score: 1	Missense_Mutation			Somatic	NA	broad.mit.edu	19	45872219	45872219	T	C			28	50	-1	-1	341
MSK-IMPACT Clinical Sequencing Cohort (MSKCC, Nat Med 2017)	P-0004567-T01-IM5	Bladder Urothelial Carcinoma	S74L	74	OncoKB: Unknown, level NA;CIViC: NA;MyCancerGenome: not present;CancerHotspot: no;3DHotspot: no	MutationAssessor: Error;SIFT: impact: deleterious, score: 0;Polyphen-2: impact: probably_damaging, score: 0.974	Missense_Mutation			NA	NA	NA	19	45872213	45872213	G	A			96	710	-1	-1	41
MSK-IMPACT Clinical Sequencing Cohort (MSKCC, Nat Med 2017)	P-0000908-T01-IM3	Bladder Urothelial Carcinoma	E79D	79	OncoKB: Unknown, level NA;CIViC: NA;MyCancerGenome: not present;CancerHotspot: no;3DHotspot: no	MutationAssessor: Error;SIFT: impact: deleterious, score: 0;Polyphen-2: impact: probably_damaging, score: 0.993	Missense_Mutation			NA	NA	NA	19	45872197	45872197	C	A			331	374	-1	-1	29
MSK-IMPACT Clinical Sequencing Cohort (MSKCC, Nat Med 2017)	P-0006714-T01-IM5	Bladder Urothelial Carcinoma	E79Kfs*4	79	OncoKB: Unknown, level NA;CIViC: NA;MyCancerGenome: not present;CancerHotspot: no;3DHotspot: no		Frame_Shift_Del			NA	NA	NA	19	45872191	45872199	CTCAATCTC	GCCTT			291	715	-1	-1	62
MSK-IMPACT Clinical Sequencing Cohort (MSKCC, Nat Med 2017)	P-0001135-T02-IM3	Bladder Urothelial Carcinoma	I80T	80	OncoKB: Unknown, level NA;CIViC: NA;MyCancerGenome: not present;CancerHotspot: no;3DHotspot: no	MutationAssessor: Error;SIFT: impact: deleterious, score: 0;Polyphen-2: impact: probably_damaging, score: 0.967	Missense_Mutation			NA	NA	NA	19	45872195	45872195	A	G			78	668	-1	-1	5
MSK-IMPACT Clinical Sequencing Cohort (MSKCC, Nat Med 2017)	P-0004137-T01-IM5	Bladder Urothelial Carcinoma	V83M	83	OncoKB: Unknown, level NA;CIViC: NA;MyCancerGenome: not present;CancerHotspot: no;3DHotspot: no	MutationAssessor: Error;SIFT: impact: deleterious, score: 0.02;Polyphen-2: impact: probably_damaging, score: 0.976	Missense_Mutation			NA	NA	NA	19	45872001	45872001	C	T			80	258	-1	-1	27
MSK-IMPACT Clinical Sequencing Cohort (MSKCC, Nat Med 2017)	P-0005449-T01-IM5	Bladder Urothelial Carcinoma	E85Q	85	OncoKB: Unknown, level NA;CIViC: NA;MyCancerGenome: not present;CancerHotspot: no;3DHotspot: no	MutationAssessor: Error;SIFT: impact: tolerated, score: 0.28;Polyphen-2: impact: probably_damaging, score: 0.93	Missense_Mutation			NA	NA	NA	19	45871995	45871995	C	G			105	355	-1	-1	36
Bladder Urothelial Carcinoma (BGI, Nat Genet 2013)	B63	Bladder Urothelial Carcinoma	E86Q	86	OncoKB: Unknown, level NA;CIViC: NA;MyCancerGenome: not present;CancerHotspot: no;3DHotspot: no	MutationAssessor: Error;SIFT: impact: deleterious, score: 0;Polyphen-2: impact: probably_damaging, score: 0.995	Missense_Mutation			NA	NA	BGI	19	45871992	45871992	C	G			-1	-1	-1	-1	93
Bladder Urothelial Carcinoma (BGI, Nat Genet 2013)	B96	Bladder Urothelial Carcinoma	E86Q	86	OncoKB: Unknown, level NA;CIViC: NA;MyCancerGenome: not present;CancerHotspot: no;3DHotspot: no	MutationAssessor: Error;SIFT: impact: deleterious, score: 0;Polyphen-2: impact: probably_damaging, score: 0.995	Missense_Mutation			NA	NA	BGI	19	45871992	45871992	C	G			-1	-1	-1	-1	259
MSK-IMPACT Clinical Sequencing Cohort (MSKCC, Nat Med 2017)	P-0003566-T01-IM5	Bladder Urothelial Carcinoma	E86Q	86	OncoKB: Unknown, level NA;CIViC: NA;MyCancerGenome: not present;CancerHotspot: no;3DHotspot: no	MutationAssessor: Error;SIFT: impact: deleterious, score: 0;Polyphen-2: impact: probably_damaging, score: 0.995	Missense_Mutation			NA	NA	NA	19	45871992	45871992	C	G			30	238	-1	-1	38
Bladder Urothelial Carcinoma (TCGA, Provisional)	TCGA-G2-A2ES-01	Bladder Urothelial Carcinoma	E86Q	86	OncoKB: Unknown, level NA;CIViC: NA;MyCancerGenome: not present;CancerHotspot: no;3DHotspot: no	MutationAssessor: Error;SIFT: impact: deleterious, score: 0;Polyphen-2: impact: probably_damaging, score: 0.995	Missense_Mutation			Somatic	NA	broad.mit.edu	19	45871992	45871992	C	G			7	26	-1	-1	391
Bladder Urothelial Carcinoma (TCGA, Provisional)	TCGA-KQ-A41N-01	Bladder Urothelial Carcinoma	E86Q	86	OncoKB: Unknown, level NA;CIViC: NA;MyCancerGenome: not present;CancerHotspot: no;3DHotspot: no	MutationAssessor: Error;SIFT: impact: deleterious, score: 0;Polyphen-2: impact: probably_damaging, score: 0.995	Missense_Mutation			Somatic	NA	broad.mit.edu	19	45871992	45871992	C	G			4	5	-1	-1	237
MSK-IMPACT Clinical Sequencing Cohort (MSKCC, Nat Med 2017)	P-0003352-T01-IM5	Bladder Urothelial Carcinoma	V121M	121	OncoKB: Unknown, level NA;CIViC: NA;MyCancerGenome: not present;CancerHotspot: no;3DHotspot: no	MutationAssessor: Error;SIFT: impact: undefined, score: NaN;Polyphen-2: impact: undefined, score: NaN	Missense_Mutation			NA	NA	NA	19	45868416	45868416	C	T			215	323	-1	-1	6
Bladder Cancer, Plasmacytoid Variant (MSKCC, Nat Genet 2016)	DS-sig-042-P	Bladder Urothelial Carcinoma	I174M	174	OncoKB: Unknown, level NA;CIViC: NA;MyCancerGenome: not present;CancerHotspot: no;3DHotspot: no	MutationAssessor: Error;SIFT: impact: undefined, score: NaN;Polyphen-2: impact: undefined, score: NaN	Missense_Mutation			Somatic	high	NA	19	45868168	45868168	G	C			79	266	0	177	23
MSK-IMPACT Clinical Sequencing Cohort (MSKCC, Nat Med 2017)	P-0000908-T01-IM3	Bladder Urothelial Carcinoma	R185Q	185	OncoKB: Unknown, level NA;CIViC: NA;MyCancerGenome: not present;CancerHotspot: no;3DHotspot: no	MutationAssessor: Error;SIFT: impact: undefined, score: NaN;Polyphen-2: impact: undefined, score: NaN	Missense_Mutation			NA	NA	NA	19	45868136	45868136	C	T			309	464	-1	-1	29
Bladder Urothelial Carcinoma (TCGA, Provisional)	TCGA-DK-A2I6-01	Bladder Urothelial Carcinoma	Y209C	209	OncoKB: Unknown, level NA;CIViC: NA;MyCancerGenome: not present;CancerHotspot: no;3DHotspot: no	MutationAssessor: Error;SIFT: impact: undefined, score: NaN;Polyphen-2: impact: undefined, score: NaN	Missense_Mutation			Somatic	NA	broad.mit.edu	19	45867774	45867774	T	C			14	39	-1	-1	257
Bladder Urothelial Carcinoma (TCGA, Provisional)	TCGA-MV-A51V-01	Bladder Urothelial Carcinoma	H210Q	210	OncoKB: Unknown, level NA;CIViC: NA;MyCancerGenome: not present;CancerHotspot: no;3DHotspot: no	MutationAssessor: Error;SIFT: impact: undefined, score: NaN;Polyphen-2: impact: undefined, score: NaN	Missense_Mutation			Somatic	NA	broad.mit.edu	19	45867770	45867770	G	C			50	40	-1	-1	1807
MSK-IMPACT Clinical Sequencing Cohort (MSKCC, Nat Med 2017)	P-0010491-T01-IM5	Bladder Urothelial Carcinoma	D234E	234	OncoKB: Unknown, level NA;CIViC: NA;MyCancerGenome: not present;CancerHotspot: no;3DHotspot: no	MutationAssessor: Error;SIFT: impact: undefined, score: NaN;Polyphen-2: impact: undefined, score: NaN	Missense_Mutation			NA	NA	NA	19	45867698	45867698	G	T			119	283	-1	-1	23
Bladder Urothelial Carcinoma (BGI, Nat Genet 2013)	B106	Bladder Urothelial Carcinoma	N238S	238	OncoKB: Likely Oncogenic, level_3a;CIViC: NA;MyCancerGenome: not present;CancerHotspot: yes;3DHotspot: no	MutationAssessor: Error;SIFT: impact: undefined, score: NaN;Polyphen-2: impact: undefined, score: NaN	Missense_Mutation			NA	NA	BGI	19	45867687	45867687	T	C			-1	-1	-1	-1	156
MSK-IMPACT Clinical Sequencing Cohort (MSKCC, Nat Med 2017)	P-0002186-T01-IM3	Bladder Urothelial Carcinoma	N238S	238	OncoKB: Likely Oncogenic, level_3a;CIViC: NA;MyCancerGenome: not present;CancerHotspot: yes;3DHotspot: no	MutationAssessor: Error;SIFT: impact: undefined, score: NaN;Polyphen-2: impact: undefined, score: NaN	Missense_Mutation			NA	NA	NA	19	45867687	45867687	T	C			223	743	-1	-1	48
MSK-IMPACT Clinical Sequencing Cohort (MSKCC, Nat Med 2017)	P-0005372-T01-IM5	Bladder Urothelial Carcinoma	N238S	238	OncoKB: Likely Oncogenic, level_3a;CIViC: NA;MyCancerGenome: not present;CancerHotspot: yes;3DHotspot: no	MutationAssessor: Error;SIFT: impact: undefined, score: NaN;Polyphen-2: impact: undefined, score: NaN	Missense_Mutation			NA	NA	NA	19	45867687	45867687	T	C			152	399	-1	-1	30
MSK-IMPACT Clinical Sequencing Cohort (MSKCC, Nat Med 2017)	P-0005511-T01-IM5	Bladder Urothelial Carcinoma	N238S	238	OncoKB: Likely Oncogenic, level_3a;CIViC: NA;MyCancerGenome: not present;CancerHotspot: yes;3DHotspot: no	MutationAssessor: Error;SIFT: impact: undefined, score: NaN;Polyphen-2: impact: undefined, score: NaN	Missense_Mutation			NA	NA	NA	19	45867687	45867687	T	C			112	1238	-1	-1	29
MSK-IMPACT Clinical Sequencing Cohort (MSKCC, Nat Med 2017)	P-0005511-T02-IM5	Bladder Urothelial Carcinoma	N238S	238	OncoKB: Likely Oncogenic, level_3a;CIViC: NA;MyCancerGenome: not present;CancerHotspot: yes;3DHotspot: no	MutationAssessor: Error;SIFT: impact: undefined, score: NaN;Polyphen-2: impact: undefined, score: NaN	Missense_Mutation			NA	NA	NA	19	45867687	45867687	T	C			203	1017	-1	-1	30
Bladder Urothelial Carcinoma (Dana Farber & MSKCC, Cancer Discov 2014)	MSKCC-0343_R	Bladder Urothelial Carcinoma	N238S	238	OncoKB: Likely Oncogenic, level_3a;CIViC: NA;MyCancerGenome: not present;CancerHotspot: yes;3DHotspot: no	MutationAssessor: Error;SIFT: impact: undefined, score: NaN;Polyphen-2: impact: undefined, score: NaN	Missense_Mutation			NA	NA	NA	19	45867687	45867687	T	C			-1	-1	-1	-1	327
Bladder Urothelial Carcinoma (TCGA, Provisional)	TCGA-DK-A1A7-01	Bladder Urothelial Carcinoma	N238S	238	OncoKB: Likely Oncogenic, level_3a;CIViC: NA;MyCancerGenome: not present;CancerHotspot: yes;3DHotspot: no	MutationAssessor: Error;SIFT: impact: undefined, score: NaN;Polyphen-2: impact: undefined, score: NaN	Missense_Mutation			Somatic	NA	broad.mit.edu	19	45867687	45867687	T	C			11	6	-1	-1	218
Bladder Urothelial Carcinoma (TCGA, Provisional)	TCGA-FD-A3N5-01	Bladder Urothelial Carcinoma	N238S	238	OncoKB: Likely Oncogenic, level_3a;CIViC: NA;MyCancerGenome: not present;CancerHotspot: yes;3DHotspot: no	MutationAssessor: Error;SIFT: impact: undefined, score: NaN;Polyphen-2: impact: undefined, score: NaN	Missense_Mutation			Somatic	NA	broad.mit.edu	19	45867687	45867687	T	C			15	39	-1	-1	287
Bladder Urothelial Carcinoma (TCGA, Provisional)	TCGA-GC-A3RC-01	Bladder Urothelial Carcinoma	N238S	238	OncoKB: Likely Oncogenic, level_3a;CIViC: NA;MyCancerGenome: not present;CancerHotspot: yes;3DHotspot: no	MutationAssessor: Error;SIFT: impact: undefined, score: NaN;Polyphen-2: impact: undefined, score: NaN	Missense_Mutation			Somatic	NA	broad.mit.edu	19	45867687	45867687	T	C			7	24	-1	-1	319
Bladder Urothelial Carcinoma (TCGA, Provisional)	TCGA-E7-A677-01	Bladder Urothelial Carcinoma	N238S	238	OncoKB: Likely Oncogenic, level_3a;CIViC: NA;MyCancerGenome: not present;CancerHotspot: yes;3DHotspot: no	MutationAssessor: Error;SIFT: impact: undefined, score: NaN;Polyphen-2: impact: undefined, score: NaN	Missense_Mutation			Somatic	NA	broad.mit.edu	19	45867687	45867687	T	C			14	26	-1	-1	223
Bladder Urothelial Carcinoma (TCGA, Provisional)	TCGA-UY-A78N-01	Bladder Urothelial Carcinoma	N238S	238	OncoKB: Likely Oncogenic, level_3a;CIViC: NA;MyCancerGenome: not present;CancerHotspot: yes;3DHotspot: no	MutationAssessor: Error;SIFT: impact: undefined, score: NaN;Polyphen-2: impact: undefined, score: NaN	Missense_Mutation			Somatic	NA	broad.mit.edu	19	45867687	45867687	T	C			14	19	-1	-1	220
MSK-IMPACT Clinical Sequencing Cohort (MSKCC, Nat Med 2017)	P-0006015-T01-IM5	Bladder Urothelial Carcinoma	V242F	242	OncoKB: Likely Oncogenic, level_3a;CIViC: NA;MyCancerGenome: not present;CancerHotspot: no;3DHotspot: no	MutationAssessor: Error;SIFT: impact: undefined, score: NaN;Polyphen-2: impact: undefined, score: NaN	Missense_Mutation			NA	NA	NA	19	45867584	45867584	C	A			305	352	-1	-1	39
Bladder Urothelial Carcinoma (Dana Farber & MSKCC, Cancer Discov 2014)	MSKCC-0500_R	Bladder Urothelial Carcinoma	V242F	242	OncoKB: Likely Oncogenic, level_3a;CIViC: NA;MyCancerGenome: not present;CancerHotspot: no;3DHotspot: no	MutationAssessor: Error;SIFT: impact: undefined, score: NaN;Polyphen-2: impact: undefined, score: NaN	Missense_Mutation			NA	NA	NA	19	45867584	45867584	C	A			-1	-1	-1	-1	687
Bladder Cancer, Plasmacytoid Variant (MSKCC, Nat Genet 2016)	DS-sig-006-P	Bladder Urothelial Carcinoma	S246F	246	OncoKB: Predicted Oncogenic, level_3a;CIViC: NA;MyCancerGenome: not present;CancerHotspot: yes;3DHotspot: no	MutationAssessor: Error;SIFT: impact: deleterious_low_confidence, score: 0;Polyphen-2: impact: unknown, score: 0	Missense_Mutation			Somatic	high	NA	19	45867571	45867571	G	A			150	202	0	142	23
MSK-IMPACT Clinical Sequencing Cohort (MSKCC, Nat Med 2017)	P-0008439-T01-IM5	Bladder Urothelial Carcinoma	S246F	246	OncoKB: Predicted Oncogenic, level_3a;CIViC: NA;MyCancerGenome: not present;CancerHotspot: yes;3DHotspot: no		Missense_Mutation			NA	NA	NA	19	45867570	45867571	GG	AA			55	394	-1	-1	20
MSK-IMPACT Clinical Sequencing Cohort (MSKCC, Nat Med 2017)	P-0004924-T01-IM5	Bladder Urothelial Carcinoma	S246Y	246	OncoKB: Predicted Oncogenic, level_3a;CIViC: NA;MyCancerGenome: not present;CancerHotspot: yes;3DHotspot: no	MutationAssessor: Error;SIFT: impact: deleterious_low_confidence, score: 0;Polyphen-2: impact: unknown, score: 0	Missense_Mutation			NA	NA	NA	19	45867571	45867571	G	T			184	566	-1	-1	28
MSK-IMPACT Clinical Sequencing Cohort (MSKCC, Nat Med 2017)	P-0005308-T01-IM5	Bladder Urothelial Carcinoma	S246Y	246	OncoKB: Predicted Oncogenic, level_3a;CIViC: NA;MyCancerGenome: not present;CancerHotspot: yes;3DHotspot: no	MutationAssessor: Error;SIFT: impact: deleterious_low_confidence, score: 0;Polyphen-2: impact: unknown, score: 0	Missense_Mutation			NA	NA	NA	19	45867571	45867571	G	T			183	478	-1	-1	28
Bladder Urothelial Carcinoma (TCGA, Provisional)	TCGA-BT-A3PK-01	Bladder Urothelial Carcinoma	S246Y	246	OncoKB: Predicted Oncogenic, level_3a;CIViC: NA;MyCancerGenome: not present;CancerHotspot: yes;3DHotspot: no	MutationAssessor: Error;SIFT: impact: deleterious_low_confidence, score: 0;Polyphen-2: impact: unknown, score: 0	Missense_Mutation			Somatic	NA	broad.mit.edu	19	45867571	45867571	G	T			8	76	-1	-1	376
Bladder Urothelial Carcinoma (TCGA, Provisional)	TCGA-H4-A2HO-01	Bladder Urothelial Carcinoma	R286W	286	OncoKB: Unknown, level NA;CIViC: NA;MyCancerGenome: not present;CancerHotspot: no;3DHotspot: no	MutationAssessor: Error;SIFT: impact: undefined, score: NaN;Polyphen-2: impact: undefined, score: NaN	Missense_Mutation			Somatic	NA	broad.mit.edu	19	45867337	45867337	G	A			9	16	-1	-1	83
MSK-IMPACT Clinical Sequencing Cohort (MSKCC, Nat Med 2017)	P-0006124-T01-IM5	Bladder Urothelial Carcinoma	L386V	386	OncoKB: Unknown, level NA;CIViC: NA;MyCancerGenome: not present;CancerHotspot: no;3DHotspot: no	MutationAssessor: Error;SIFT: impact: undefined, score: NaN;Polyphen-2: impact: undefined, score: NaN	Missense_Mutation			NA	NA	NA	19	45864863	45864863	G	C			323	1426	-1	-1	76
Bladder Urothelial Carcinoma (TCGA, Provisional)	TCGA-E7-A5KE-01	Bladder Urothelial Carcinoma	A443V	443	OncoKB: Unknown, level NA;CIViC: NA;MyCancerGenome: not present;CancerHotspot: no;3DHotspot: no	MutationAssessor: Error;SIFT: impact: undefined, score: NaN;Polyphen-2: impact: undefined, score: NaN	Missense_Mutation			Somatic	NA	broad.mit.edu	19	45860781	45860781	G	A			66	55	-1	-1	184
MSK-IMPACT Clinical Sequencing Cohort (MSKCC, Nat Med 2017)	P-0007015-T01-IM5	Bladder Urothelial Carcinoma	P463L	463	OncoKB: Likely Oncogenic, level_3a;CIViC: NA;MyCancerGenome: not present;CancerHotspot: yes;3DHotspot: no	MutationAssessor: Error;SIFT: impact: undefined, score: NaN;Polyphen-2: impact: undefined, score: NaN	Missense_Mutation			NA	NA	NA	19	45860619	45860619	G	A			657	1032	-1	-1	16
Bladder Urothelial Carcinoma (Dana Farber & MSKCC, Cancer Discov 2014)	MSKCC-0411_R	Bladder Urothelial Carcinoma	P463L	463	OncoKB: Likely Oncogenic, level_3a;CIViC: NA;MyCancerGenome: not present;CancerHotspot: yes;3DHotspot: no	MutationAssessor: Error;SIFT: impact: undefined, score: NaN;Polyphen-2: impact: undefined, score: NaN	Missense_Mutation			NA	NA	NA	19	45860619	45860619	G	A			-1	-1	-1	-1	416
MSK-IMPACT Clinical Sequencing Cohort (MSKCC, Nat Med 2017)	P-0003362-T01-IM5	Bladder Urothelial Carcinoma	P463Q	463	OncoKB: Likely Oncogenic, level_3a;CIViC: NA;MyCancerGenome: not present;CancerHotspot: yes;3DHotspot: no	MutationAssessor: Error;SIFT: impact: undefined, score: NaN;Polyphen-2: impact: undefined, score: NaN	Missense_Mutation			NA	NA	NA	19	45860619	45860619	G	T			336	419	-1	-1	27
Bladder Urothelial Carcinoma (BGI, Nat Genet 2013)	B110	Bladder Urothelial Carcinoma	P463S	463	OncoKB: Likely Oncogenic, level_3a;CIViC: NA;MyCancerGenome: not present;CancerHotspot: yes;3DHotspot: no	MutationAssessor: Error;SIFT: impact: undefined, score: NaN;Polyphen-2: impact: undefined, score: NaN	Missense_Mutation			NA	NA	BGI	19	45860620	45860620	G	A			-1	-1	-1	-1	99
Bladder Urothelial Carcinoma (BGI, Nat Genet 2013)	B85-0	Bladder Urothelial Carcinoma	T484A	484	OncoKB: Predicted Oncogenic, level_3a;CIViC: NA;MyCancerGenome: not present;CancerHotspot: yes;3DHotspot: no	MutationAssessor: Error;SIFT: impact: undefined, score: NaN;Polyphen-2: impact: undefined, score: NaN	Missense_Mutation			NA	NA	BGI	19	45860557	45860557	T	C			-1	-1	-1	-1	145
MSK-IMPACT Clinical Sequencing Cohort (MSKCC, Nat Med 2017)	P-0003433-T01-IM5	Bladder Urothelial Carcinoma	T484A	484	OncoKB: Predicted Oncogenic, level_3a;CIViC: NA;MyCancerGenome: not present;CancerHotspot: yes;3DHotspot: no	MutationAssessor: Error;SIFT: impact: undefined, score: NaN;Polyphen-2: impact: undefined, score: NaN	Missense_Mutation			NA	NA	NA	19	45860557	45860557	T	C			626	182	-1	-1	63
MSK-IMPACT Clinical Sequencing Cohort (MSKCC, Nat Med 2017)	P-0005087-T01-IM5	Bladder Urothelial Carcinoma	T484A	484	OncoKB: Predicted Oncogenic, level_3a;CIViC: NA;MyCancerGenome: not present;CancerHotspot: yes;3DHotspot: no	MutationAssessor: Error;SIFT: impact: undefined, score: NaN;Polyphen-2: impact: undefined, score: NaN	Missense_Mutation			NA	NA	NA	19	45860557	45860557	T	C			82	573	-1	-1	43
Bladder Urothelial Carcinoma (BGI, Nat Genet 2013)	B59	Bladder Urothelial Carcinoma	T484M	484	OncoKB: Predicted Oncogenic, level_3a;CIViC: NA;MyCancerGenome: not present;CancerHotspot: yes;3DHotspot: no	MutationAssessor: Error;SIFT: impact: undefined, score: NaN;Polyphen-2: impact: undefined, score: NaN	Missense_Mutation			NA	NA	BGI	19	45860556	45860556	G	A			-1	-1	-1	-1	130
MSK-IMPACT Clinical Sequencing Cohort (MSKCC, Nat Med 2017)	P-0006714-T01-IM5	Bladder Urothelial Carcinoma	T484M	484	OncoKB: Predicted Oncogenic, level_3a;CIViC: NA;MyCancerGenome: not present;CancerHotspot: yes;3DHotspot: no	MutationAssessor: Error;SIFT: impact: undefined, score: NaN;Polyphen-2: impact: undefined, score: NaN	Missense_Mutation			NA	NA	NA	19	45860556	45860556	G	A			449	830	-1	-1	62
MSK-IMPACT Clinical Sequencing Cohort (MSKCC, Nat Med 2017)	P-0008880-T01-IM5	Bladder Urothelial Carcinoma	T484M	484	OncoKB: Predicted Oncogenic, level_3a;CIViC: NA;MyCancerGenome: not present;CancerHotspot: yes;3DHotspot: no	MutationAssessor: Error;SIFT: impact: undefined, score: NaN;Polyphen-2: impact: undefined, score: NaN	Missense_Mutation			NA	NA	NA	19	45860556	45860556	G	A			77	1037	-1	-1	29
Bladder Urothelial Carcinoma (TCGA, Provisional)	TCGA-BT-A3PJ-01	Bladder Urothelial Carcinoma	T484M	484	OncoKB: Predicted Oncogenic, level_3a;CIViC: NA;MyCancerGenome: not present;CancerHotspot: yes;3DHotspot: no	MutationAssessor: Error;SIFT: impact: undefined, score: NaN;Polyphen-2: impact: undefined, score: NaN	Missense_Mutation			Somatic	NA	broad.mit.edu	19	45860556	45860556	G	A			27	50	-1	-1	451
MSK-IMPACT Clinical Sequencing Cohort (MSKCC, Nat Med 2017)	P-0010491-T01-IM5	Bladder Urothelial Carcinoma	S506F	506	OncoKB: Unknown, level NA;CIViC: NA;MyCancerGenome: not present;CancerHotspot: no;3DHotspot: no	MutationAssessor: Error;SIFT: impact: undefined, score: NaN;Polyphen-2: impact: undefined, score: NaN	Missense_Mutation			NA	NA	NA	19	45858949	45858949	G	A			45	330	-1	-1	23
MSK-IMPACT Clinical Sequencing Cohort (MSKCC, Nat Med 2017)	P-0003561-T01-IM5	Bladder Urothelial Carcinoma	E509K	509	OncoKB: Unknown, level NA;CIViC: NA;MyCancerGenome: not present;CancerHotspot: no;3DHotspot: no	MutationAssessor: Error;SIFT: impact: undefined, score: NaN;Polyphen-2: impact: undefined, score: NaN	Missense_Mutation			NA	NA	NA	19	45858941	45858941	C	T			149	174	-1	-1	24
Bladder Cancer, Plasmacytoid Variant (MSKCC, Nat Genet 2016)	P-0000083-T01-IM3	Bladder Urothelial Carcinoma	G521M	521	OncoKB: Unknown, level NA;CIViC: NA;MyCancerGenome: not present;CancerHotspot: no;3DHotspot: no		Missense_Mutation			NA	NA	MSK-IMPACT	19	45858091	45858092	CC	AT			94	333	0	167	116
MSK-IMPACT Clinical Sequencing Cohort (MSKCC, Nat Med 2017)	P-0000083-T01-IM3	Bladder Urothelial Carcinoma	G521M	521	OncoKB: Unknown, level NA;CIViC: NA;MyCancerGenome: not present;CancerHotspot: no;3DHotspot: no		Missense_Mutation			NA	NA	NA	19	45858091	45858092	CC	AT			94	333	-1	-1	116
Bladder Urothelial Carcinoma (Dana Farber & MSKCC, Cancer Discov 2014)	MSKCC-0389_R	Bladder Urothelial Carcinoma	E606G	606	OncoKB: Likely Oncogenic, level_3a;CIViC: NA;MyCancerGenome: not present;CancerHotspot: yes;3DHotspot: no	MutationAssessor: Error;SIFT: impact: deleterious, score: 0;Polyphen-2: impact: possibly_damaging, score: 0.766	Missense_Mutation			NA	NA	NA	19	45856355	45856355	T	C			-1	-1	-1	-1	497
Bladder Cancer, Plasmacytoid Variant (MSKCC, Nat Genet 2016)	DS-sig-038-P	Bladder Urothelial Carcinoma	E606K	606	OncoKB: Likely Oncogenic, level_3a;CIViC: NA;MyCancerGenome: not present;CancerHotspot: yes;3DHotspot: no	MutationAssessor: Error;SIFT: impact: deleterious, score: 0;Polyphen-2: impact: probably_damaging, score: 0.994	Missense_Mutation			Somatic	high	NA	19	45856356	45856356	C	T			185	756	0	278	30
Bladder Cancer (MSKCC, Eur Urol 2014)	DS-bla-111	Bladder Urothelial Carcinoma	E606K	606	OncoKB: Likely Oncogenic, level_3a;CIViC: NA;MyCancerGenome: not present;CancerHotspot: yes;3DHotspot: no	MutationAssessor: Error;SIFT: impact: deleterious, score: 0;Polyphen-2: impact: probably_damaging, score: 0.994	Missense_Mutation			Somatic	high	mskcc.org	19	45856356	45856356	C	T			95	914	0	1059	31
MSK-IMPACT Clinical Sequencing Cohort (MSKCC, Nat Med 2017)	P-0005359-T01-IM5	Bladder Urothelial Carcinoma	E606Q	606	OncoKB: Likely Oncogenic, level_3a;CIViC: NA;MyCancerGenome: not present;CancerHotspot: yes;3DHotspot: no	MutationAssessor: Error;SIFT: impact: deleterious, score: 0;Polyphen-2: impact: probably_damaging, score: 0.999	Missense_Mutation			NA	NA	NA	19	45856356	45856356	C	G			199	244	-1	-1	40
MSK-IMPACT Clinical Sequencing Cohort (MSKCC, Nat Med 2017)	P-0005606-T01-IM5	Bladder Urothelial Carcinoma	E606Q	606	OncoKB: Likely Oncogenic, level_3a;CIViC: NA;MyCancerGenome: not present;CancerHotspot: yes;3DHotspot: no	MutationAssessor: Error;SIFT: impact: deleterious, score: 0;Polyphen-2: impact: probably_damaging, score: 0.999	Missense_Mutation			NA	NA	NA	19	45856356	45856356	C	G			373	735	-1	-1	37
MSK-IMPACT Clinical Sequencing Cohort (MSKCC, Nat Med 2017)	P-0006209-T01-IM5	Bladder Urothelial Carcinoma	E606Q	606	OncoKB: Likely Oncogenic, level_3a;CIViC: NA;MyCancerGenome: not present;CancerHotspot: yes;3DHotspot: no	MutationAssessor: Error;SIFT: impact: deleterious, score: 0;Polyphen-2: impact: probably_damaging, score: 0.999	Missense_Mutation			NA	NA	NA	19	45856356	45856356	C	G			287	1020	-1	-1	27
Bladder Urothelial Carcinoma (TCGA, Provisional)	TCGA-CU-A0YR-01	Bladder Urothelial Carcinoma	G607A	607	OncoKB: Unknown, level NA;CIViC: NA;MyCancerGenome: not present;CancerHotspot: no;3DHotspot: no	MutationAssessor: Error;SIFT: impact: deleterious, score: 0;Polyphen-2: impact: probably_damaging, score: 1	Missense_Mutation			Somatic	NA	broad.mit.edu	19	45856352	45856352	C	G			43	109	-1	-1	143
MSK-IMPACT Clinical Sequencing Cohort (MSKCC, Nat Med 2017)	P-0010582-T01-IM5	Bladder Urothelial Carcinoma	D609E	609	OncoKB: Likely Oncogenic, level_3a;CIViC: NA;MyCancerGenome: not present;CancerHotspot: yes;3DHotspot: no	MutationAssessor: Error;SIFT: impact: deleterious, score: 0;Polyphen-2: impact: probably_damaging, score: 0.994	Missense_Mutation			NA	NA	NA	19	45856345	45856345	G	C			626	631	-1	-1	19
Bladder Urothelial Carcinoma (Dana Farber & MSKCC, Cancer Discov 2014)	DFCI-35_R	Bladder Urothelial Carcinoma	D609E	609	OncoKB: Likely Oncogenic, level_3a;CIViC: NA;MyCancerGenome: not present;CancerHotspot: yes;3DHotspot: no	MutationAssessor: Error;SIFT: impact: deleterious, score: 0;Polyphen-2: impact: probably_damaging, score: 0.994	Missense_Mutation			NA	NA	NA	19	45856345	45856345	G	T			-1	-1	-1	-1	365
Bladder Urothelial Carcinoma (Dana Farber & MSKCC, Cancer Discov 2014)	DFCI-05_R	Bladder Urothelial Carcinoma	D609G	609	OncoKB: Likely Oncogenic, level_3a;CIViC: NA;MyCancerGenome: not present;CancerHotspot: yes;3DHotspot: no	MutationAssessor: Error;SIFT: impact: deleterious, score: 0;Polyphen-2: impact: probably_damaging, score: 0.996	Missense_Mutation			NA	NA	NA	19	45856346	45856346	T	C			-1	-1	-1	-1	243
Bladder Urothelial Carcinoma (TCGA, Provisional)	TCGA-BT-A20O-01	Bladder Urothelial Carcinoma	H659Y	659	OncoKB: Unknown, level NA;CIViC: NA;MyCancerGenome: not present;CancerHotspot: no;3DHotspot: no	MutationAssessor: Error;SIFT: impact: deleterious, score: 0;Polyphen-2: impact: probably_damaging, score: 0.99	Missense_Mutation			Somatic	NA	broad.mit.edu	19	45855835	45855835	G	A			19	57	-1	-1	185
Bladder Urothelial Carcinoma (Dana Farber & MSKCC, Cancer Discov 2014)	DFCI-06_R	Bladder Urothelial Carcinoma	G665A	665	OncoKB: Likely Oncogenic, level_3a;CIViC: NA;MyCancerGenome: not present;CancerHotspot: no;3DHotspot: no	MutationAssessor: Error;SIFT: impact: deleterious, score: 0;Polyphen-2: impact: probably_damaging, score: 0.992	Missense_Mutation			NA	NA	NA	19	45855816	45855816	C	G			-1	-1	-1	-1	71
Bladder Urothelial Carcinoma (TCGA, Provisional)	TCGA-E5-A2PC-01	Bladder Urothelial Carcinoma	G675S	675	OncoKB: Unknown, level NA;CIViC: NA;MyCancerGenome: not present;CancerHotspot: no;3DHotspot: no	MutationAssessor: Error;SIFT: impact: deleterious, score: 0;Polyphen-2: impact: probably_damaging, score: 1	Missense_Mutation			Somatic	NA	broad.mit.edu	19	45855787	45855787	C	T			38	44	-1	-1	213
Bladder Urothelial Carcinoma (TCGA, Provisional)	TCGA-GD-A3OQ-01	Bladder Urothelial Carcinoma	Q758E	758	OncoKB: Unknown, level NA;CIViC: NA;MyCancerGenome: not present;CancerHotspot: no;3DHotspot: no	MutationAssessor: Error;SIFT: impact: undefined, score: NaN;Polyphen-2: impact: undefined, score: NaN	Missense_Mutation			Somatic	NA	broad.mit.edu	19	45854898	45854898	G	C			39	283	-1	-1	122
MSK-IMPACT Clinical Sequencing Cohort (MSKCC, Nat Med 2017)	P-0002186-T01-IM3	Bladder Urothelial Carcinoma	M1?		OncoKB: Unknown, level NA;CIViC: NA;MyCancerGenome: not present;CancerHotspot: no;3DHotspot: no		Translation_Start_Site			NA	NA	NA	19	45873797	45873797	A	C			202	704	-1	-1	48
Bladder Urothelial Carcinoma (BGI, Nat Genet 2013)	B89-4	Bladder Urothelial Carcinoma	X120_splice		OncoKB: Unknown, level NA;CIViC: NA;MyCancerGenome: not present;CancerHotspot: no;3DHotspot: no		Splice_Site			NA	NA	BGI	19	45868418	45868418	T	A			-1	-1	-1	-1	219
**gray boxes denote duplicate samples or non-missense mutations
